# Supplementary material for: Low genetic diversity despite multiple introductions of the invasive plant species Impatiens glandulifera in Europe
Source: PubMed Central journal article supplement (PMC4546075; doi:10.1186/s12863-015-0242-8), 2015-08-20

Full data set

Value of BIC  
versus number of clusters

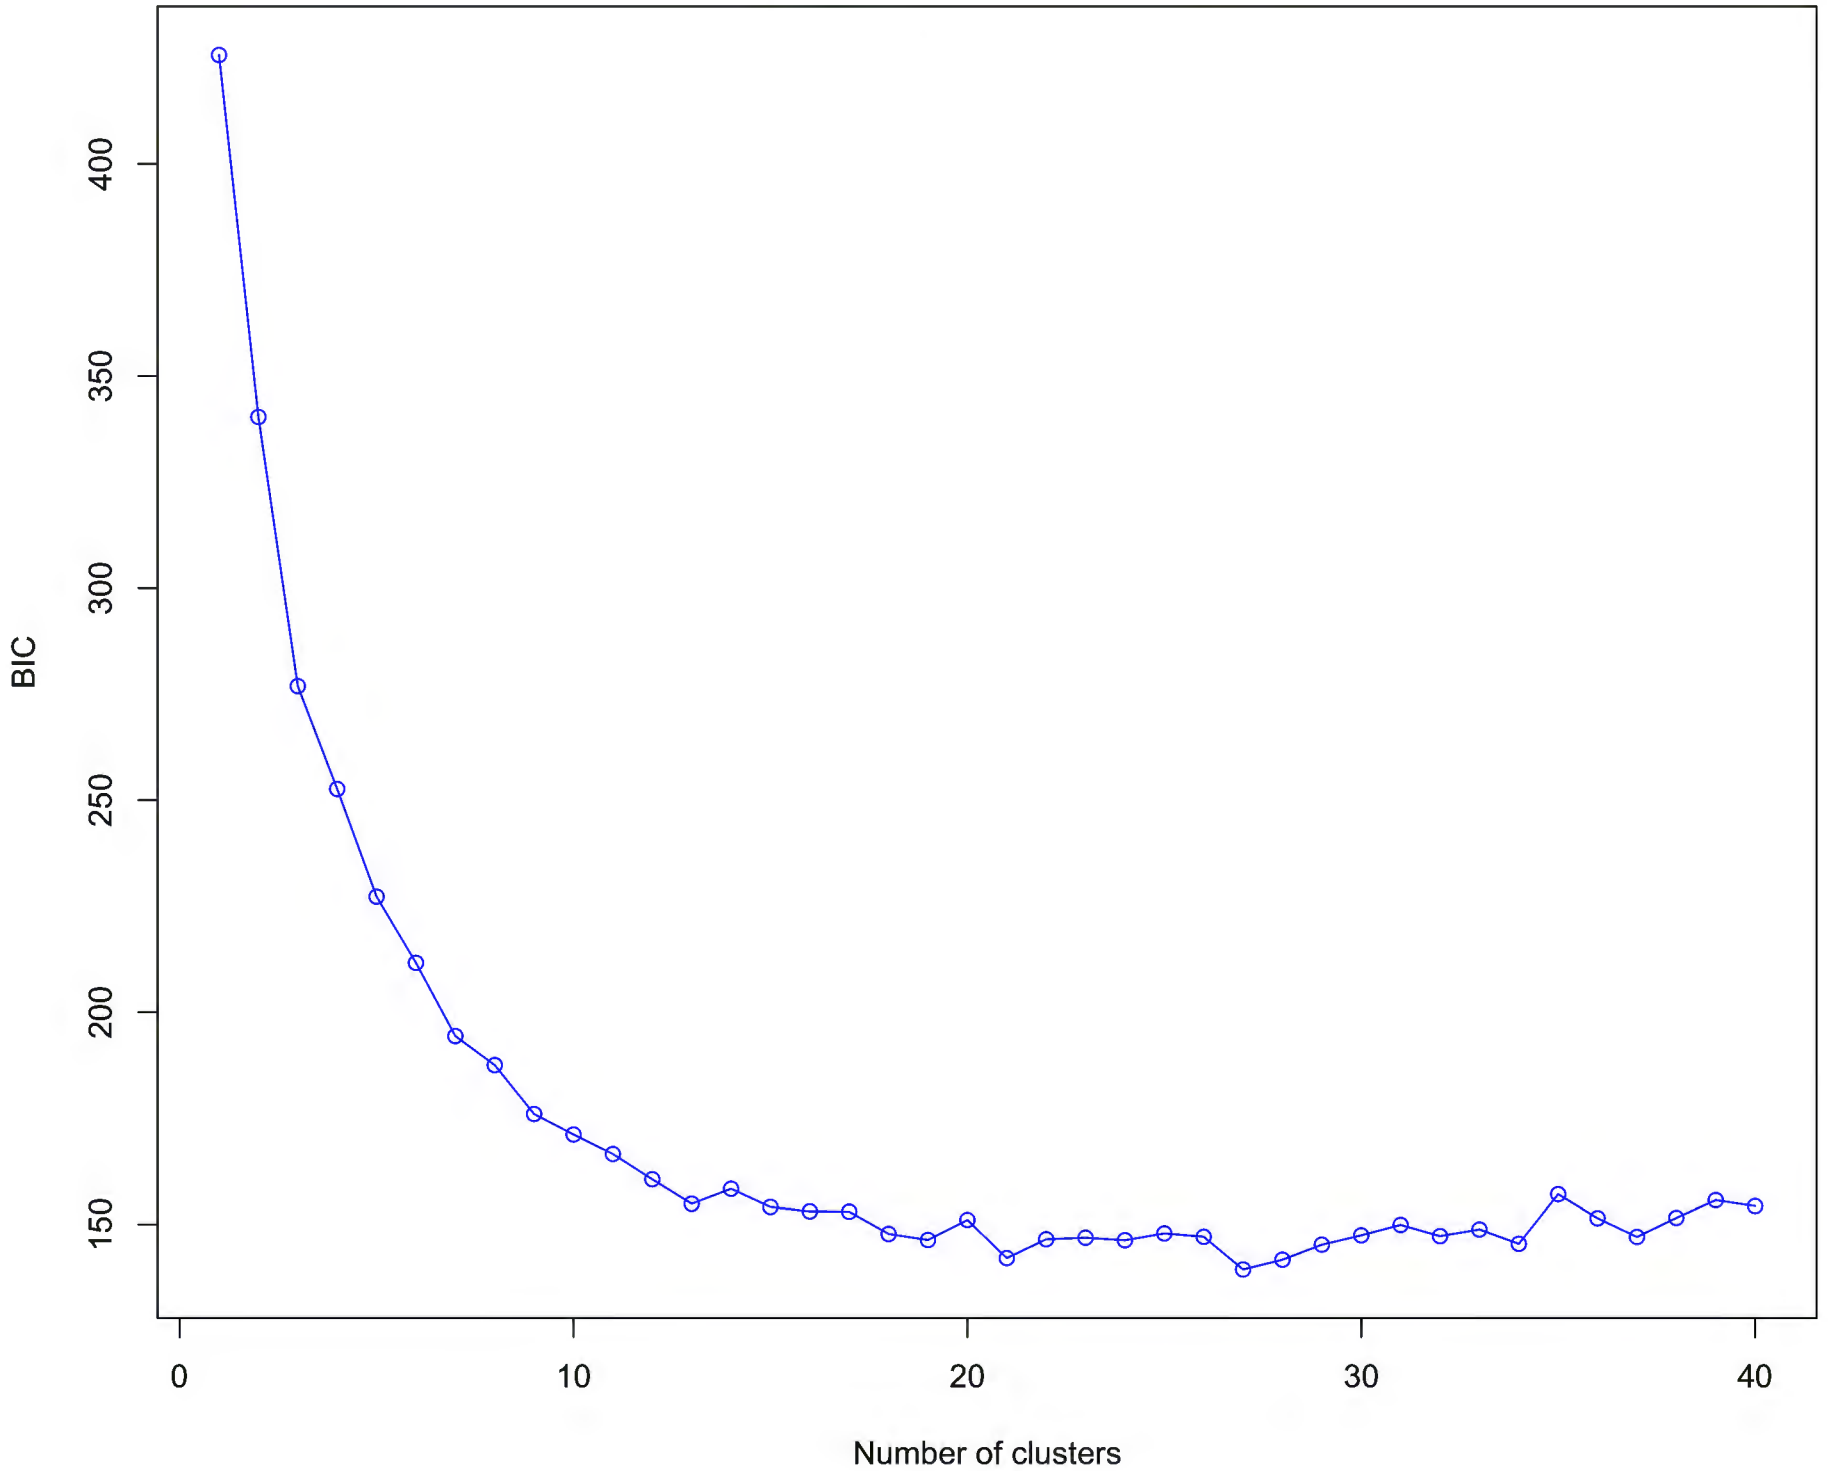

European data set

Value of BIC  
versus number of clusters

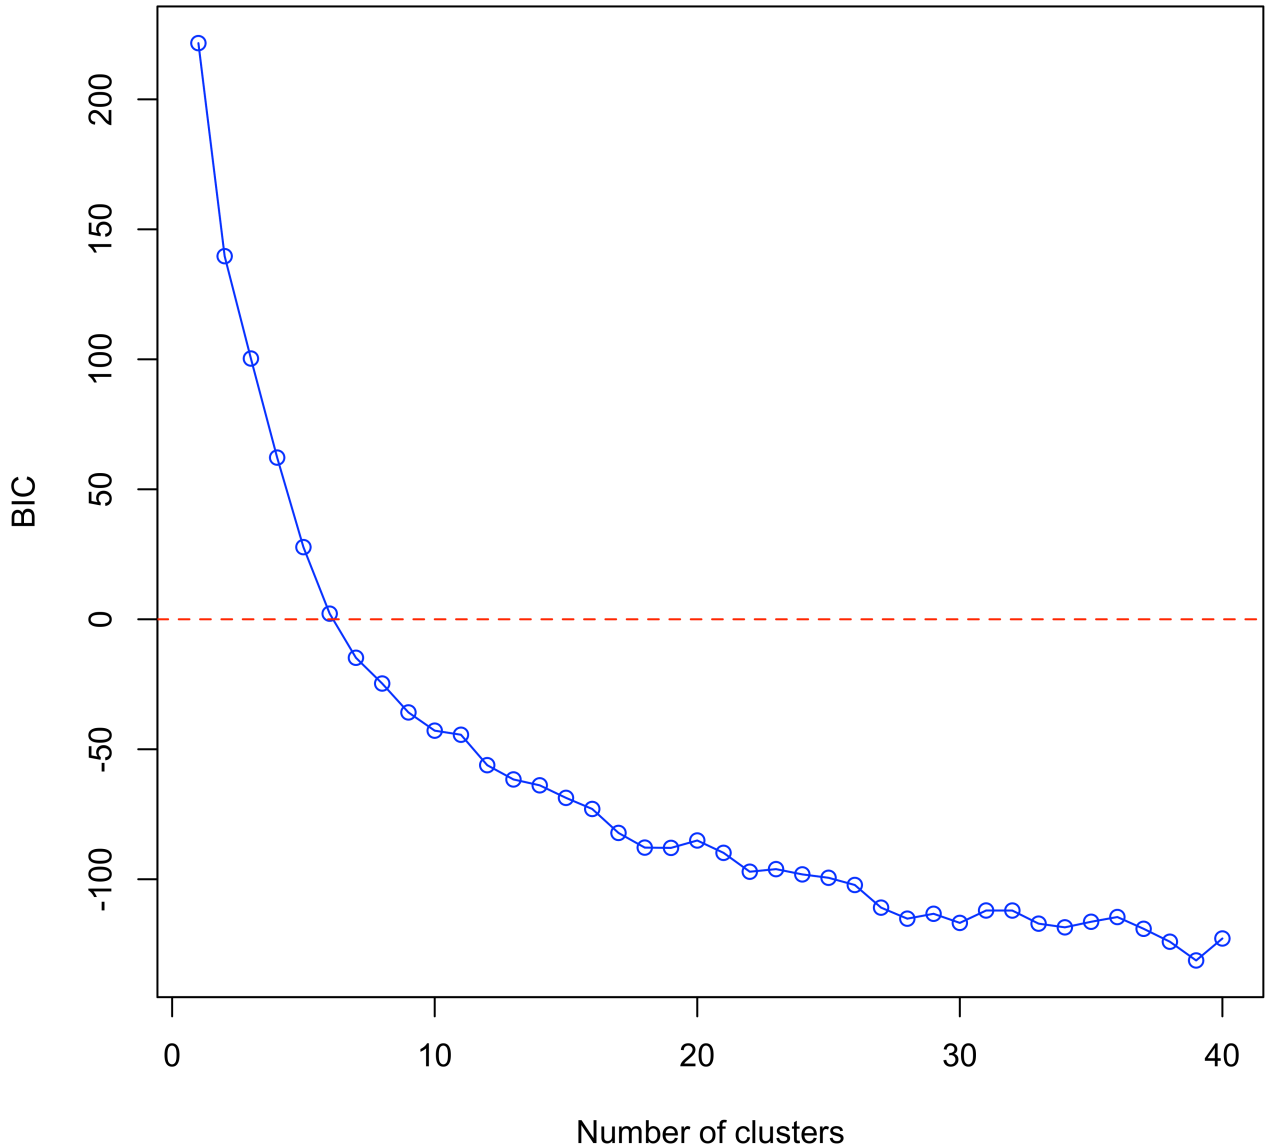

# Kashmir data set

## Value of BIC versus number of clusters

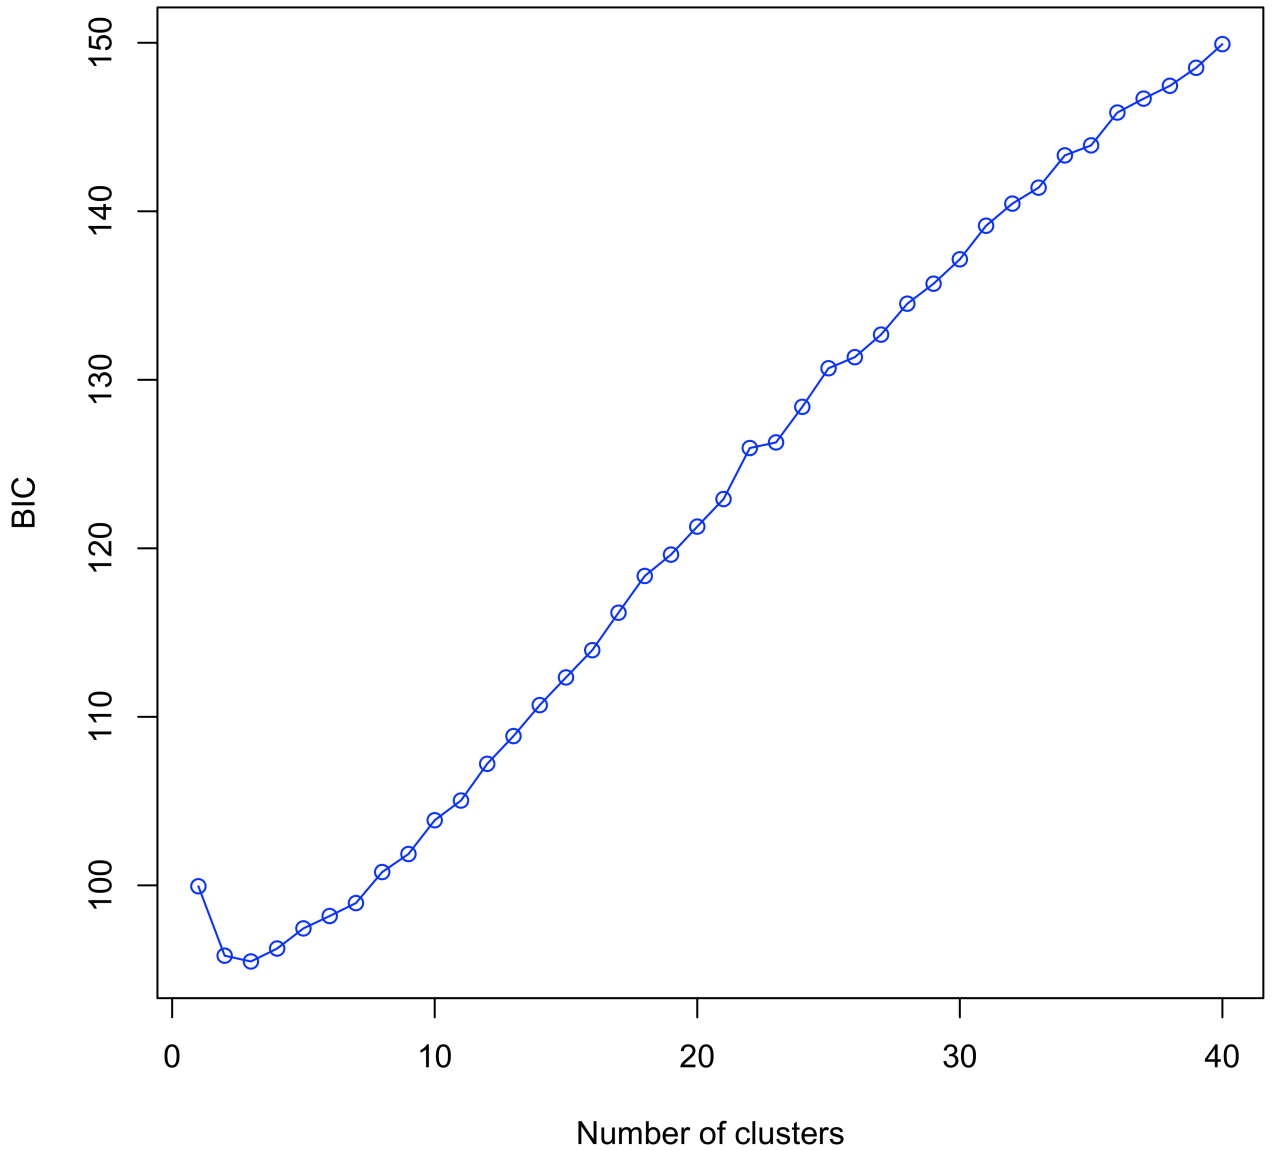

Supplement: 12863_2015_242_MOESM5_ESM.pdf [file 12863_2015_242_MOESM5_ESM.pdf]
