# Supplementary material for: Low genetic diversity despite multiple introductions of the invasive plant species Impatiens glandulifera in Europe
Source: PubMed Central journal article supplement (PMC4546075; doi:10.1186/s12863-015-0242-8), 2015-08-20

### Scenario 1

(Warning ! Time is not to scale.)

- N2c
- N1
- N2
- N3
- N2b

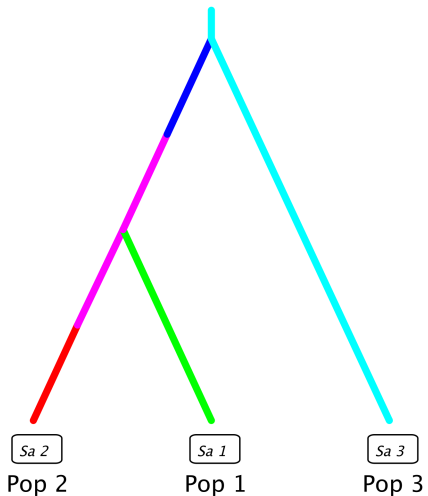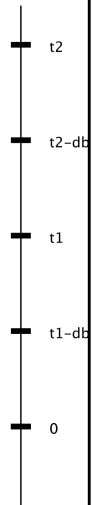

### Scenario 2

(Warning ! Time is not to scale.)

- N1b
- N1
- N2
- N3
- N2b

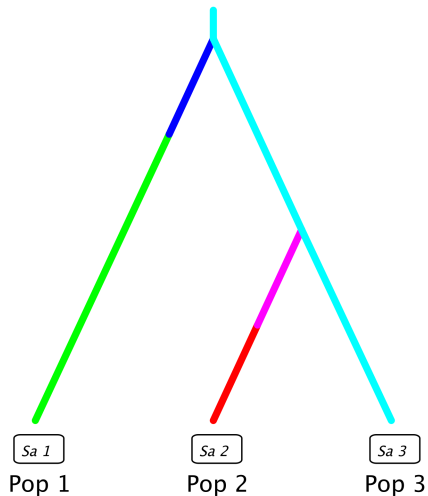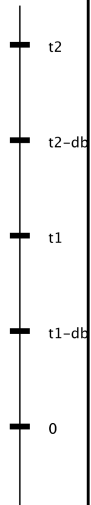

Supplement: 12863_2015_242_MOESM6_ESM.pdf [file 12863_2015_242_MOESM6_ESM.pdf]
