# Supplementary material for: Low genetic diversity despite multiple introductions of the invasive plant species Impatiens glandulifera in Europe
Source: PubMed Central journal article supplement (PMC4546075; doi:10.1186/s12863-015-0242-8), 2015-08-20
Supplement: 12863_2015_242_MOESM9_ESM.pdf [file 12863_2015_242_MOESM9_ESM.pdf]

## Additional file 12

**Prior distribution of parameters used in ABC analysis. Population size parameters ( $N_i$ ) are given in units of  $N_e$  and time parameters ( $t_i$ ) in units of generations. Gamma distribution shape parameter = 2. P: geometric distribution parameter, SNI: Single Nucleotide Insertion**

| Parameter                           | Distribution | Minimum            | Maximum            |
|-------------------------------------|--------------|--------------------|--------------------|
| <b>Demographic parameter priors</b> |              |                    |                    |
| N1                                  | Uniform      | 10                 | 10000              |
| N1b                                 | Uniform      | 10                 | 10000              |
| N2                                  | Uniform      | 10                 | 10000              |
| N2b                                 | Uniform      | 10                 | 10000              |
| N2c                                 | Uniform      | 10                 | 10000              |
| N3                                  | Uniform      | 10                 | 10000              |
| t1                                  | Uniform      | 10                 | 10000              |
| t2                                  | Uniform      | 10                 | 10000              |
| <b>Mutation model priors</b>        |              |                    |                    |
| Mean mutation rate                  | Uniform      | $1 \times 10^{-4}$ | $1 \times 10^{-3}$ |
| Individual locus mutation rate      | Gamma        | $1 \times 10^{-5}$ | $1 \times 10^{-2}$ |
| Mean locus coefficient P            | Uniform      | 0.1                | 0.3                |
| Individual locus coefficient P      | Gamma        | $1 \times 10^{-2}$ | 0.9                |
| Mean SNI rate                       | Log-uniform  | $1 \times 10^{-8}$ | $1 \times 10^{-4}$ |
| Individual locus SNI rate           | Gamma        | $1 \times 10^{-9}$ | $1 \times 10^{-3}$ |
